# Supplementary material for: Tree aboveground carbon storage correlates with environmental gradients and functional diversity in a tropical forest
Source: PubMed Central journal article supplement (PMC4899748; doi:10.1038/srep25304), 2016-06-09
Supplement: srep25304-s1.pdf [file srep25304-s1.pdf]

## **Supplementary Information**

### **Tree aboveground carbon storage correlates with environmental gradients and functional diversity in a tropical forest**

**Yong Shen<sup>1</sup>, Shixiao Yu<sup>1</sup>, Juyu Lian<sup>2</sup>, Hao Shen<sup>2</sup>, Honglin Cao<sup>2</sup>, Huanping Lu<sup>3</sup> & Wanhui Ye<sup>2,\*</sup>**

<sup>1</sup>Department of Ecology, School of Life Sciences/State Key Laboratory of Biocontrol, Sun Yat-sen University, Guangzhou 510275, PR China

<sup>2</sup>Key Laboratory of Vegetation Restoration and Management of Degraded Ecosystems, South China Botanical Garden, Chinese Academy of Sciences, Guangzhou 510650, PR China

<sup>3</sup>Ecological Meteorological Center of Guangdong Province, Guangzhou 510640, PR China

**\*Corresponding author:** Prof. Wanhui Ye

Email: why@scbg.ac.cn

Tel: +86 20 37252981

**Table S1.** Minimum, maximum, mean and coefficient of variation (CV) of topography, soil variables and plant functional traits in DHS plot.

| Variable                                              | Minimum | Maximum | Mean   | CV    |
|-------------------------------------------------------|---------|---------|--------|-------|
| <b>Topography (N = 500)</b>                           |         |         |        |       |
| Convexity (m)                                         | -13.32  | 17.67   | 0.18   | 31.01 |
| <b>Soil (N = 500)</b>                                 |         |         |        |       |
| Total N (mg g <sup>-1</sup> )                         | 133.26  | 291.09  | 201.79 | 0.18  |
| Available N (mg g <sup>-1</sup> )                     | 0.47    | 2.76    | 1.18   | 0.43  |
| Total P (mg g <sup>-1</sup> )                         | 0.41    | 4.87    | 1.80   | 0.58  |
| Available P (mg g <sup>-1</sup> )                     | 0.20    | 0.44    | 0.28   | 0.19  |
| Total K (mg g <sup>-1</sup> )                         | 30.11   | 121.18  | 54.99  | 0.36  |
| Available K (mg g <sup>-1</sup> )                     | 8.45    | 31.22   | 18.15  | 0.19  |
| Organic matter (mg g <sup>-1</sup> )                  | 42.61   | 98.05   | 60.98  | 0.18  |
| Water content (%)                                     | 10.25   | 27.99   | 18.80  | 0.14  |
| pH                                                    | 3.55    | 3.95    | 3.75   | 0.02  |
| <b>Functional trait (N = 92)</b>                      |         |         |        |       |
| Leaf area (cm <sup>2</sup> )                          | 5.98    | 983.42  | 45.45  | 2.34  |
| Leaf dry matter content (g g <sup>-1</sup> )          | 0.21    | 0.52    | 0.37   | 0.17  |
| Specific leaf area (cm <sup>2</sup> g <sup>-1</sup> ) | 63.07   | 266.55  | 139.40 | 0.35  |
| Wood density (g cm <sup>-3</sup> )                    | 0.28    | 0.85    | 0.58   | 0.20  |
| Max DBH (cm)                                          | 1.10    | 90.00   | 24.07  | 0.76  |

**Table S2.** Factor loadings of the first component of principal component analysis (PCA) on soil variables in DHS plot.

| Variable       | PC1    |
|----------------|--------|
| Organic matter | 0.372  |
| pH             | -0.359 |
| Water content  | -0.188 |
| Total K        | 0.344  |
| Available K    | 0.183  |
| Total N        | 0.391  |
| Available N    | 0.394  |
| Total P        | -0.306 |
| Available P    | 0.379  |

**Table S3.** Minimum, maximum, mean and coefficient of variation (CV) of functional dominance, functional diversity and carbon storage in DHS plot.

| Variable                                         | Minimum | Maximum | Mean   | CV   |
|--------------------------------------------------|---------|---------|--------|------|
| <b>Functional dominance (N = 500)</b>            |         |         |        |      |
| LA.CWM                                           | 17.43   | 157.31  | 31.97  | 0.52 |
| LDMC.CWM                                         | 0.29    | 0.42    | 0.38   | 0.06 |
| SLA.CWM                                          | 89.56   | 239.36  | 128.57 | 0.18 |
| WD.CWM                                           | 0.49    | 0.72    | 0.63   | 0.05 |
| DBH.CWM                                          | 24.92   | 51.86   | 35.18  | 0.15 |
| <b>Functional dispersion (N = 500)</b>           |         |         |        |      |
| LA.FDis                                          | 0.04    | 1.21    | 0.16   | 0.98 |
| LDMC.FDis                                        | 0.32    | 1.35    | 0.77   | 0.21 |
| SLA.FDis                                         | 0.21    | 1.52    | 0.63   | 0.43 |
| WD.FDis                                          | 0.23    | 1.00    | 0.66   | 0.21 |
| DBH.FDis                                         | 0.27    | 1.43    | 0.82   | 0.25 |
| Multi.FDis                                       | 1.02    | 2.40    | 1.74   | 0.14 |
| <b>C storage (Mg C ha<sup>-1</sup>, N = 500)</b> | 10.80   | 240.73  | 103.19 | 0.42 |

See Table 1 for abbreviations in the text.

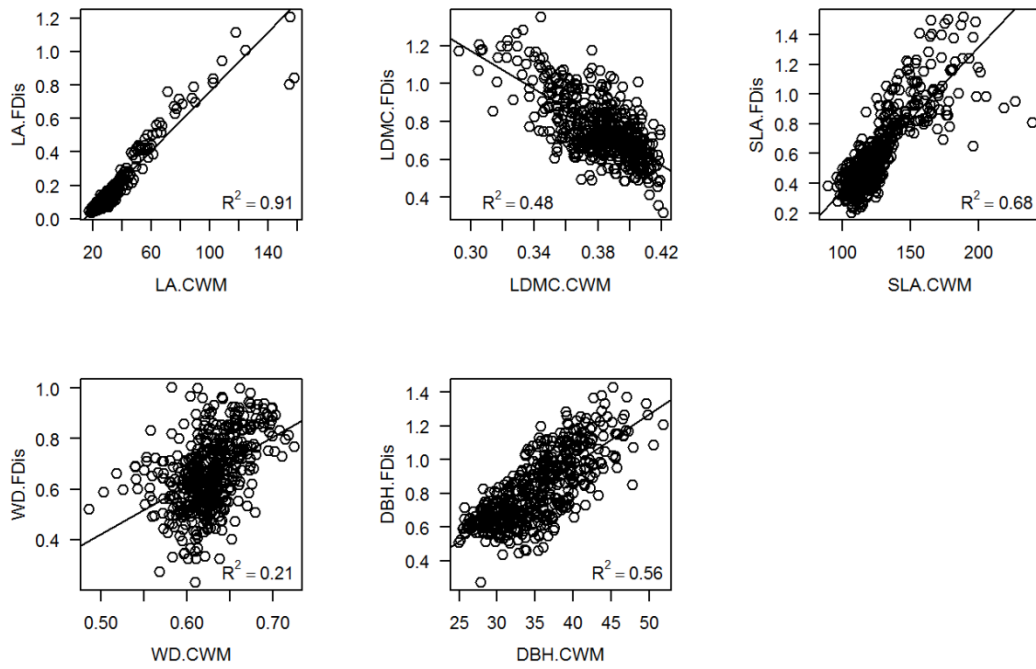

**Figure S1.** Functional dominance (CWM) versus functional diversity (FDis) of each trait for 500 20 m  $\times$  20 m quadrats in DHS plot. Significant relationships are shown by solid lines. See Table 1 for abbreviations.

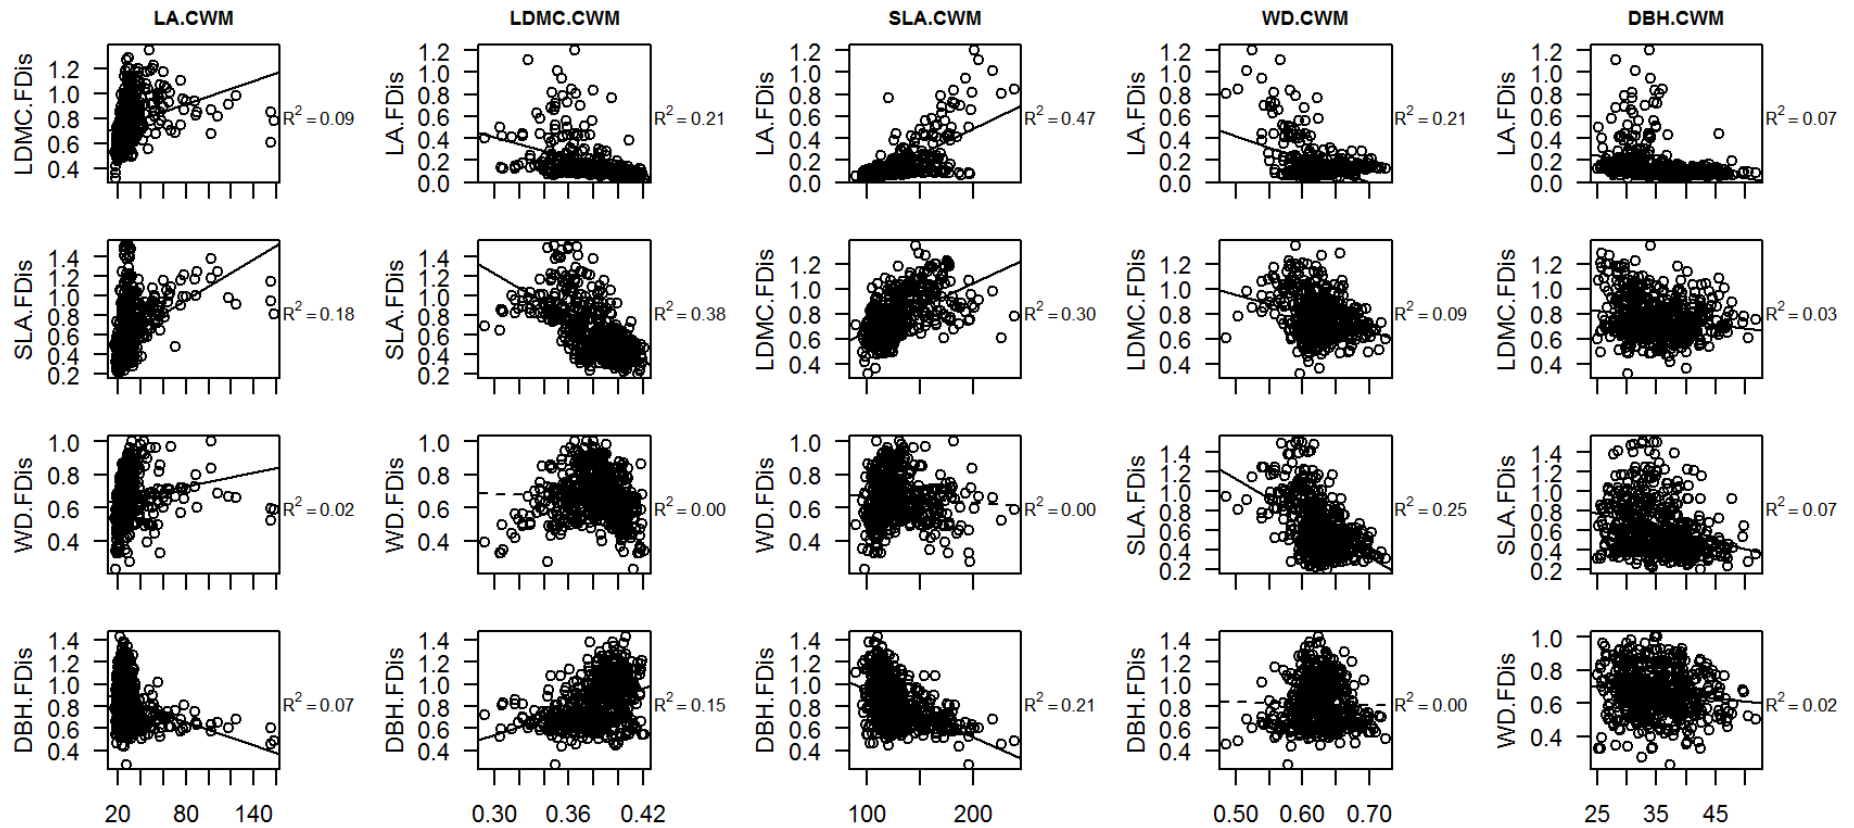

**Figure S2.** Functional dominance (CWM) versus functional diversity (FDIs) of different traits for 500 20 m  $\times$  20 m quadrats in DHS plot.

Significant relationships are shown by solid lines, and insignificant relationships are shown by dashed lines. See Table 1 for abbreviations.
